# Supplementary material for: Hemodynamic Characteristics and Outcomes of Pulmonary Hypertension in Patients Undergoing Tricuspid Valve Repair or Replacement
Source: PubMed Central journal article supplement — CJC Open. 2020 Dec 16;3(4):488–97. doi: 10.1016/j.cjco.2020.12.008 (PMC8129475; doi:10.1016/j.cjco.2020.12.008), 2020-12-16
Supplement: mmc1.pdf [file mmc1.pdf]

### Supplemental Figure S1

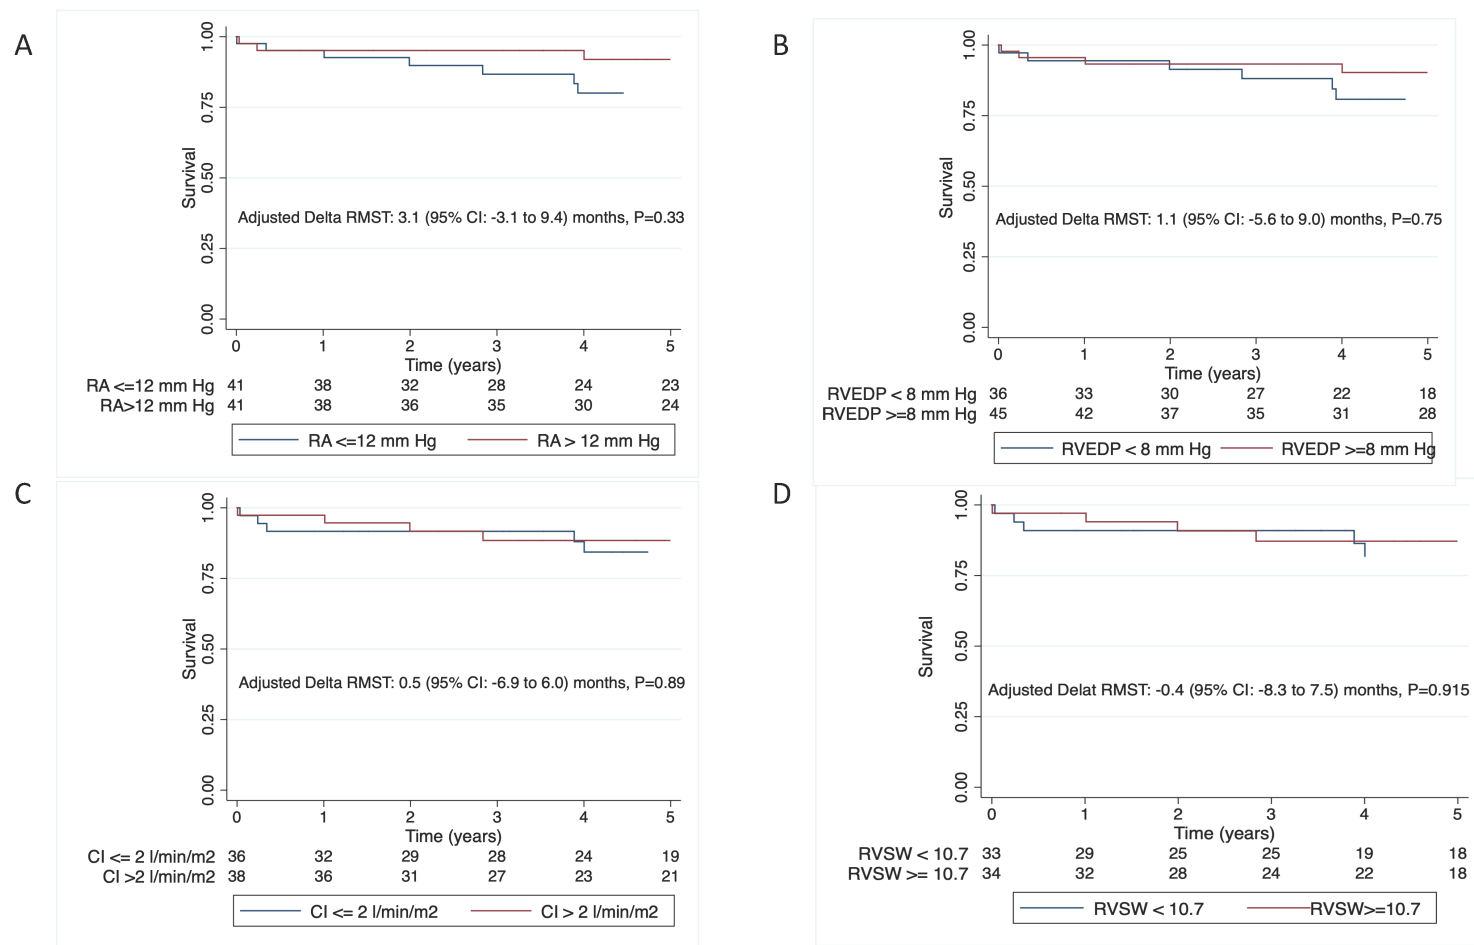

**Supplemental Figure S1.** Survival in Patients Undergoing TVR or TVr Categorized by Median Values of Invasive Hemodynamic Measures of Right Ventricular Function. RA – right atrial pressure, RVEDP – right ventricular end diastolic pressure, CI – cardiac index, RVSW – right ventricular stroke work, TVR – tricuspid valve replacement, and TVr – tricuspid valve repair.

**Supplemental Figure S2**

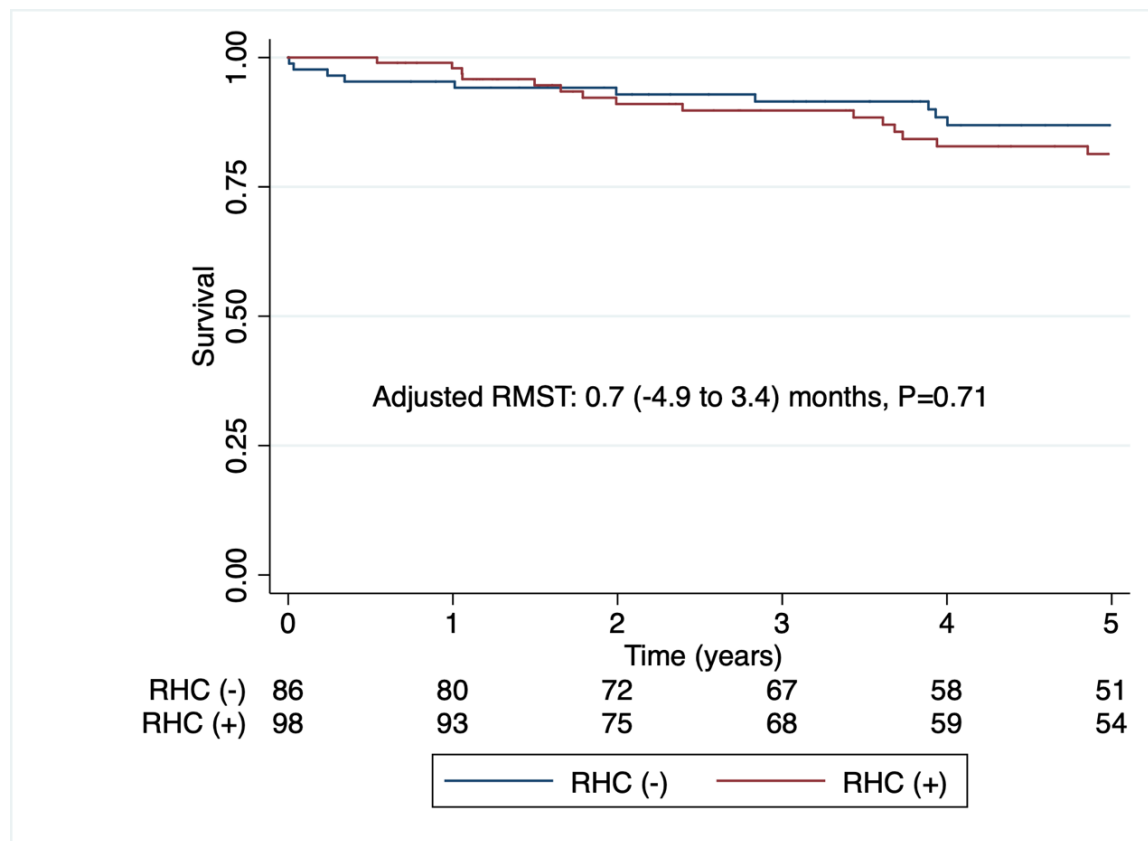

**Supplemental Figure S2.** Survival in Patients Undergoing TVR or TVr Categorized by the Availability of Invasive Hemodynamic Data. RHC – right heart catheterization, TVR – tricuspid valve replacement, and TVr – tricuspid valve repair.

**Supplemental Table S1: Etiology of Tricuspid Valve Disease**

| <b>Etiology</b>                          | <b>N (%)</b>    |
|------------------------------------------|-----------------|
| <b>Primary Tricuspid Regurgitation</b>   | <b>16 (19%)</b> |
| • Myxomatous disease                     | 3 (3.5%)        |
| • Pacemaker                              | 4 (4.7%)        |
| • Endomyocardial biopsy                  | 3 (3.6%)        |
| • Infective endocarditis                 | 2 (2.4%)        |
| • Rheumatic heart disease                | 1 (1.2%)        |
| • Radiation                              | 1 (1.2%)        |
| • Carcinoid disease                      | 1 (1.2%)        |
| • Restricted leaflet                     | 1 (1.2%)        |
| <b>Secondary Tricuspid Regurgitation</b> | <b>66 (77%)</b> |
| • Cardiomyopathy                         | 9 (10.5%)       |
| • Mitral valve disease                   | 42(48.8%)       |
| • Isolated TR                            | 4 (4.7%)        |
| • Aortic valve disease                   | 7 (8.1%)        |

- Congenital heart disease 3 (3.5%)
- Constrictive pericarditis 1 (1.2%)

**Tricuspid Stenosis 3 (3.5%)**

**Unknown 1 (1%)**

---

**Supplemental Table S2: Difference in Restricted Mean Survival Time after TVR/TVr based on Pulmonary Vascular Hemodynamics Categorized by Concomitant Left Sided Valve Surgery**

| <b>Characteristics</b>                               | <b>Survival Time,<br/>months</b> | <b>Unadjusted <math>\Delta</math> RMST,<br/>months<br/>(95% CI)</b> | <b>P-Value</b> |
|------------------------------------------------------|----------------------------------|---------------------------------------------------------------------|----------------|
| <b>Concomitant Left Sided Valve Surgery</b>          |                                  |                                                                     |                |
| Mean PA pressure ( $\geq 30$ mm Hg vs. $< 30$ mm Hg) | 57 vs. 53                        | 4.0 (- 5.6 to 13.5)                                                 | 0.41           |
| PVR ( $\geq 2.5$ WU vs. $< 2.5$ WU)                  | 52 vs. 60                        | -7.7 (-14.9 to 0.56)                                                | 0.03           |
| PAC ( $\geq 2.3$ ml/mm Hg vs. $< 2.3$ ml/mm Hg)      | 55 vs. 54                        | 1.0 (-10.0 to 11.9)                                                 | 0.86           |
| Ea ( $\geq 0.8$ mmHg/ml vs. $< 0.8$ mmHg/ml)         | 54 vs. 56                        | -1.7 (-12.2 to 8.9)                                                 | 0.76           |
| <b>No Concomitant Left Sided Valve Surgery</b>       |                                  |                                                                     |                |
| Mean PA pressure ( $\geq 30$ mm Hg vs. $< 30$ mm Hg) | 55 vs. 54                        | 0.5 (-10.9 to 12.0)                                                 | 0.93           |
| PVR ( $\geq 2.5$ WU vs. $< 2.5$ WU)                  | 49 vs. 56                        | -7.7 (-19.9 to 4.5)                                                 | 0.22           |
| PAC ( $\geq 2.3$ ml/mm Hg vs. $< 2.3$ ml/mm Hg)      | 55 vs. 51                        | 3.5 (-9.9 to 16.8)                                                  | 0.61           |
| Ea ( $\geq 0.8$ mmHg/ml vs. $< 0.8$ mmHg/ml)         | 48 vs. 56                        | 8.2 (-23.2 to 6.9)                                                  | 0.29           |
